# Supplementary material for: Mechanistic and kinetic study of the O + CH3OCH2 reaction and the unimolecular decomposition of CH3OCH2O
Source: Royal Society of Chemistry journal article supplement (doi:10.1039/b510459a), 2005-01-01
Supplement: b510459a.pdf [file b510459a.pdf]

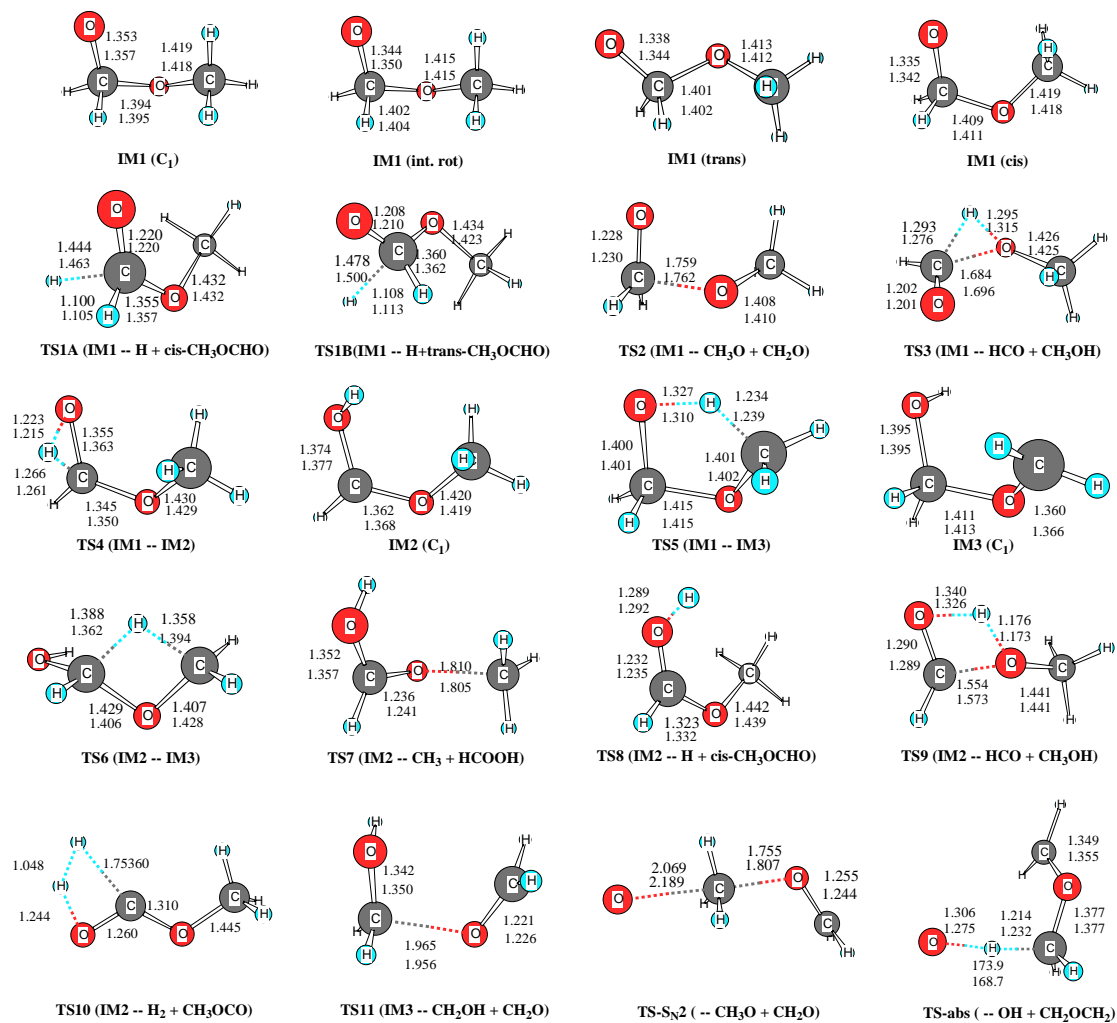

**Figure S1.** MP2/6-311G(d,p) (upper) and MP2/G3MP2Large (lower) optimized geometries for the intermediates and transition states involved in the  $O + CH_3OCH_2$  reaction. Bond distances are in angstroms and angles are in degrees.
